# Supplementary material for: Catalytic depolymerization of Kraft lignin to high yield alkylated-phenols over CoMo/SBA-15 catalyst in supercritical ethanol
Source: Royal Society of Chemistry journal article supplement (doi:10.1039/d3ra05018a), 2023-01-01
Supplement: d3ra05018a1.pdf [file d3ra05018a1.pdf]

**Supplementary file for**

**Catalytic depolymerization of Kraft lignin to high yield alkylated-phenols over  
CoMo/SBA-15 catalyst in supercritical ethanol**

Masud Rana, Shubho Ghosh, Theoneste Nshizirungu and Jeong-Hun Park\*

*Department of Environment and Energy Engineering, Chonnam National University, Gwangju, 61186,  
South Korea.*

Corresponding author: Tel: 82-62-530-1855, Fax: 82-62-530-1859;

E-mail: [parkjeo1@jnu.ac.kr](mailto:parkjeo1@jnu.ac.kr)

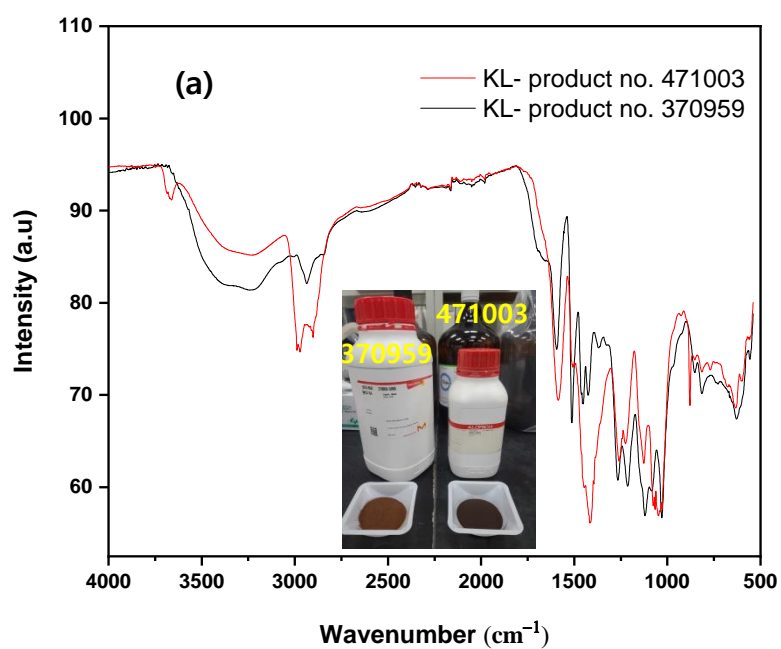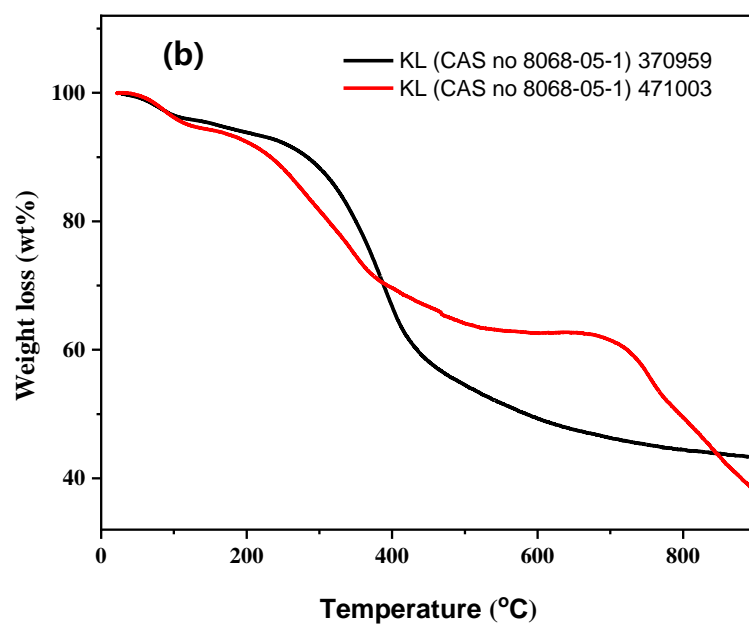

**Fig. S1** (a) FT-IR spectra and (b) thermogravimetric (TG) analyses of commercially available KL (Sigma-Aldrich, USA) with the product number 370959 and 471003.

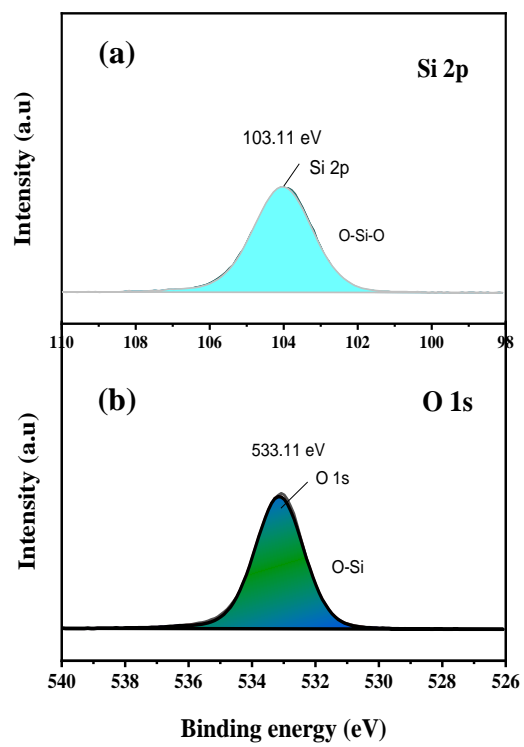

**Fig. S2** Core level spectra of (a, b) Si 2p and O 1s in SBA-15.

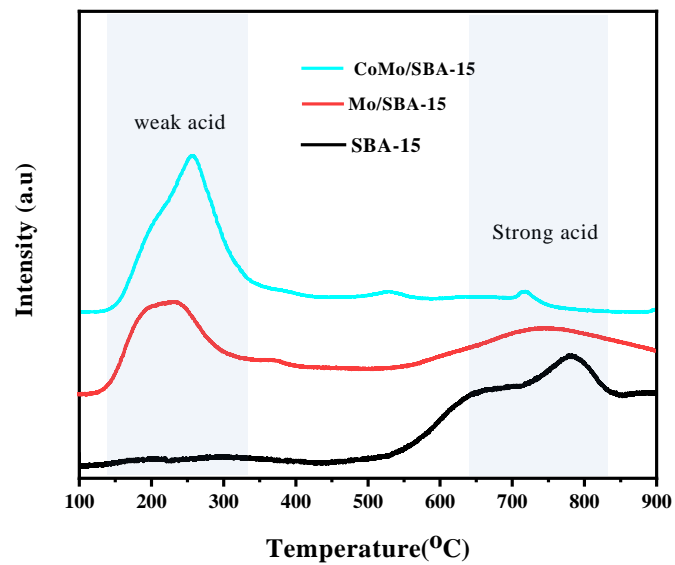

**Fig. S3** NH<sub>3</sub>-TPD spectra of SBA-15, Mo/SBA-15 and CoMo/SBA-15 catalysts.

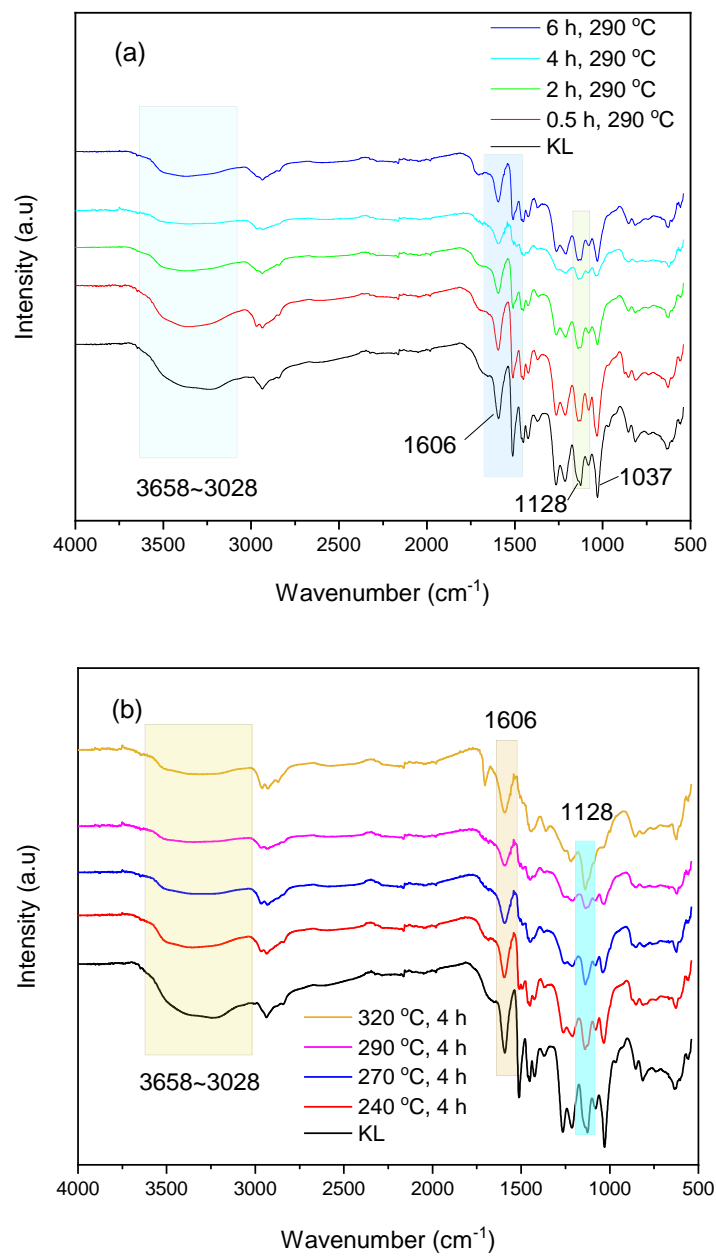

**Fig. S4** FTIR spectra of solid residues obtained at different times (a) and temperatures (b).

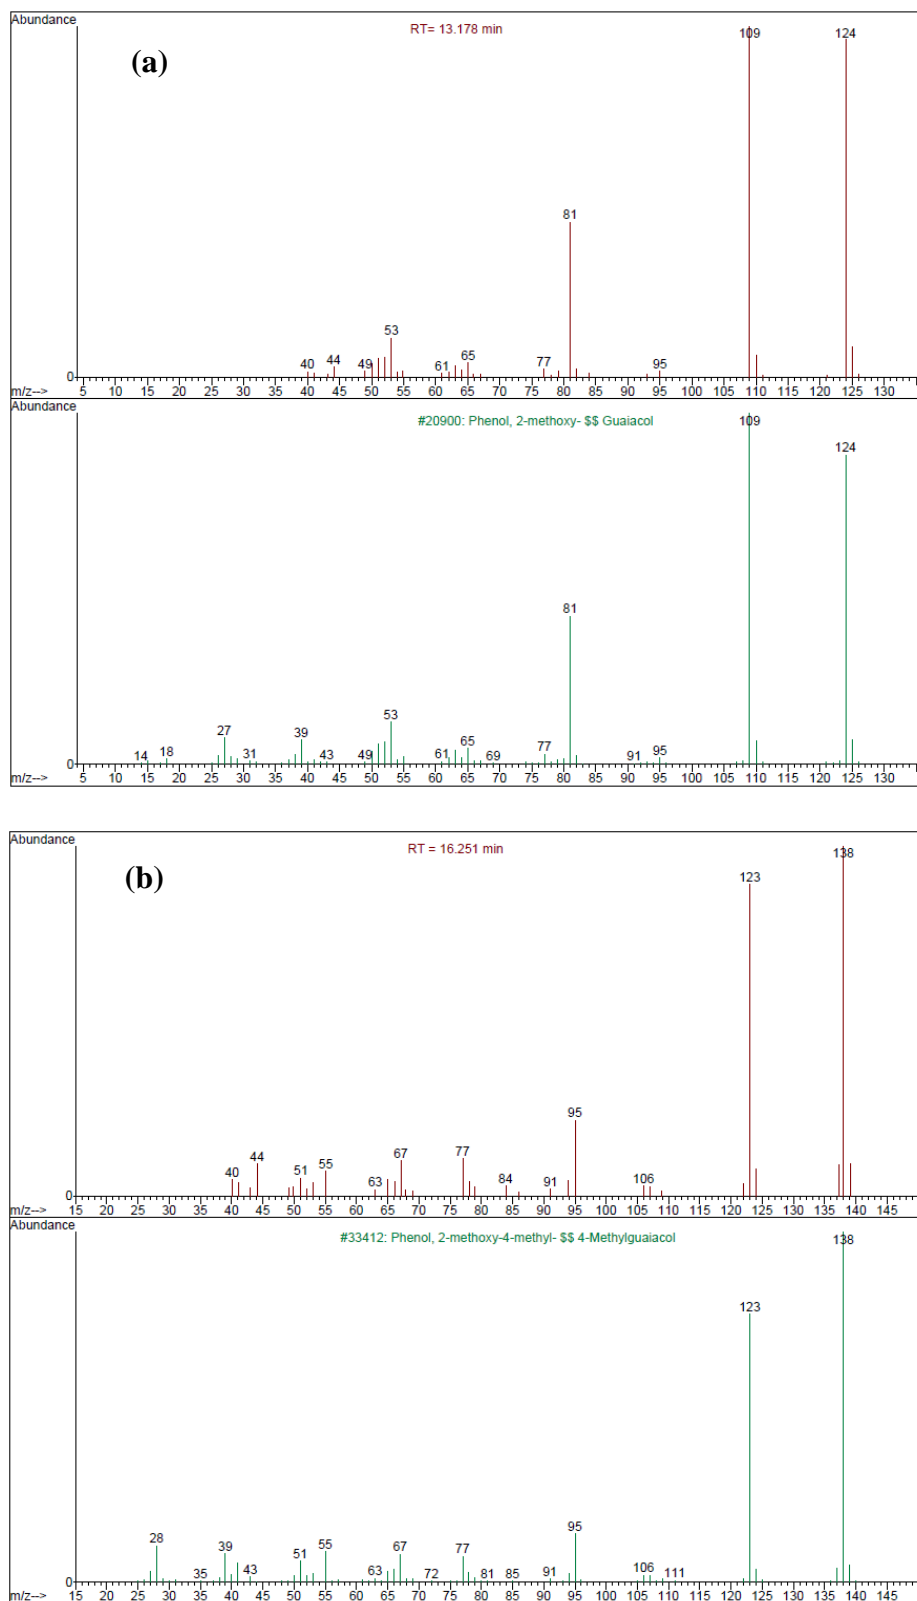

**Fig. S5** (a) Mass spectra from the peak 13.20 and the standard guaiacol. (b) Mass spectra from the peak 16.25 and the standard 4-methylguaiacol.

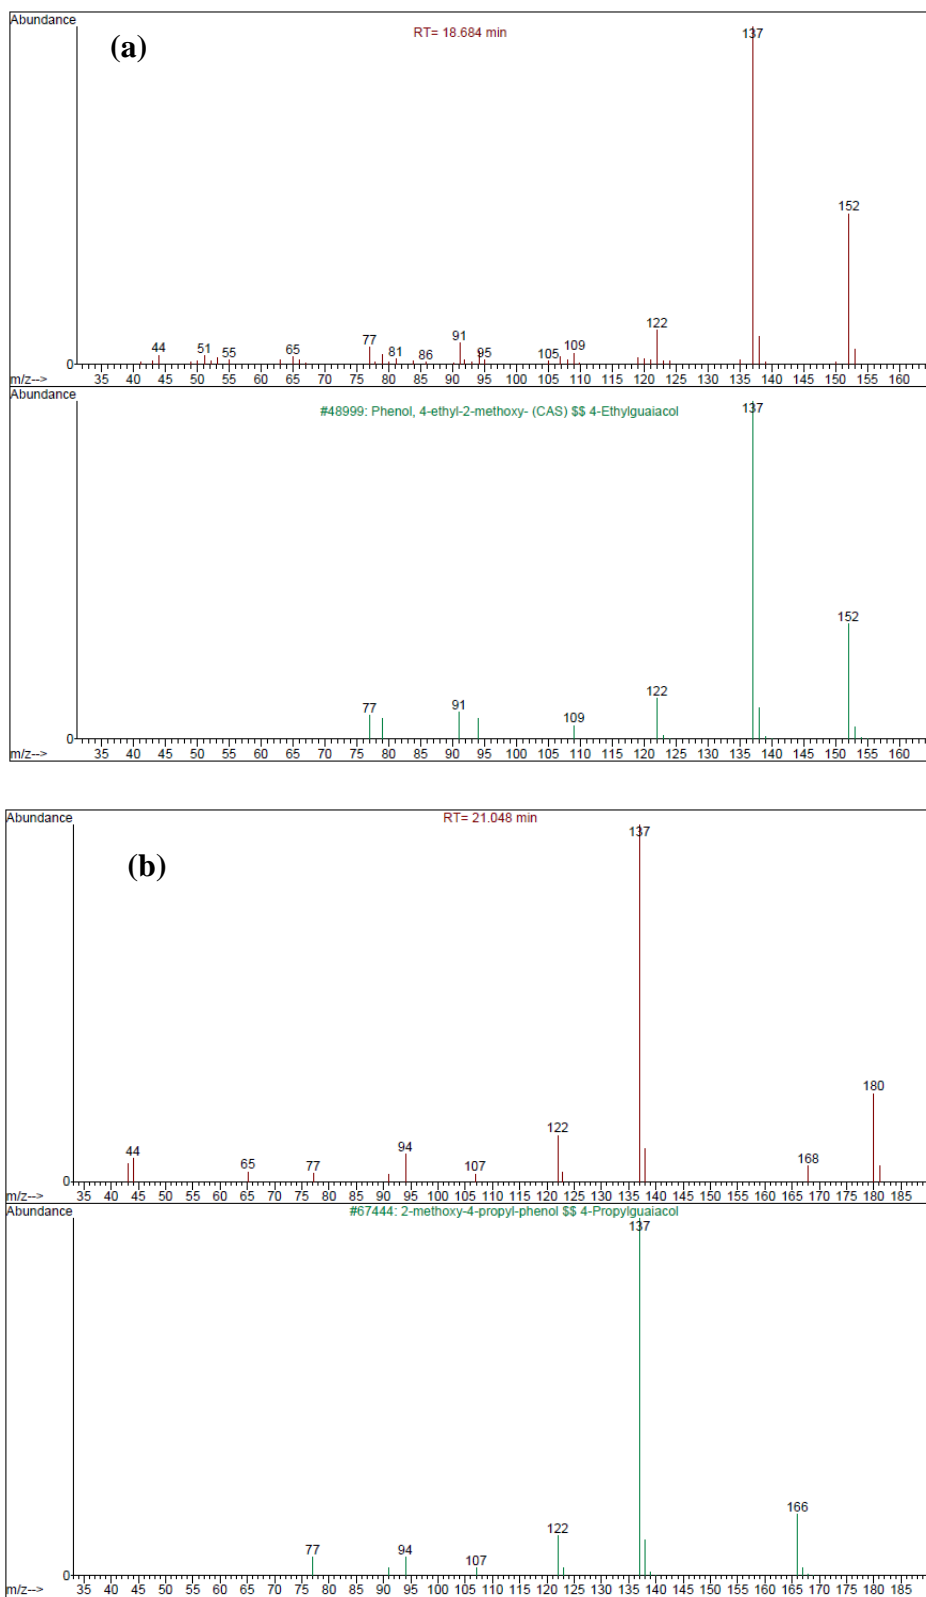

**Fig. S6** (a) Mass spectra from the peak 18.67 and the standard 4-ethylguaiacol. (b) Mass spectra from the peak 21.05 and the standard 4-propylguaiacol.

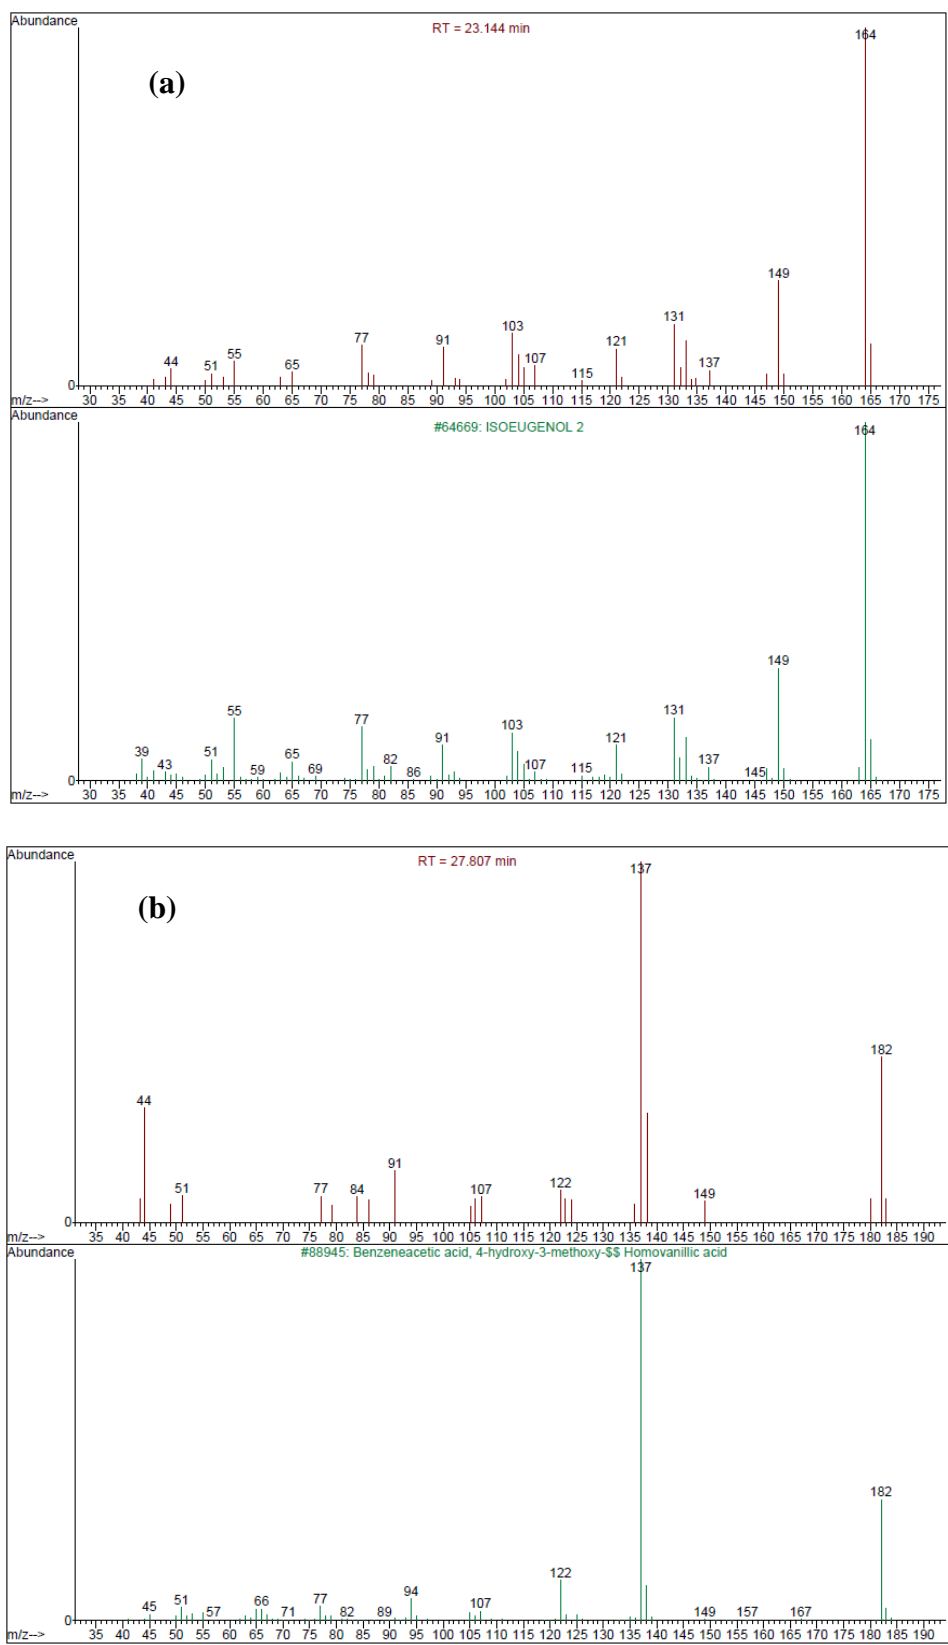

**Fig. S7** (a) Mass spectra from the peak 23.14 and the standard isoeugenol. (b) Mass spectra from the peak 27.81 and the standard homovanillic acid.



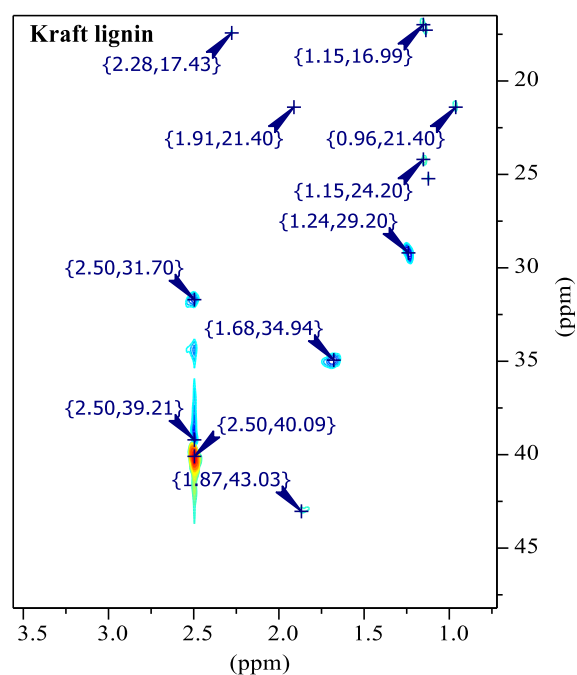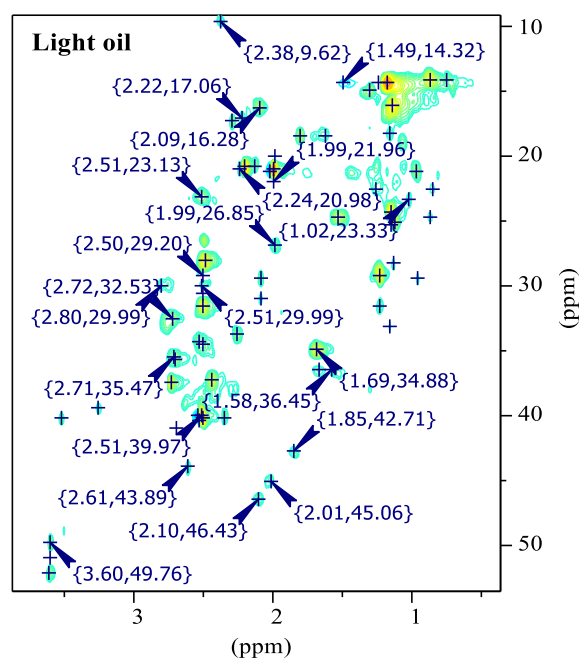

**Fig. S8** Assignments of peaks/peak picking in the aliphatic hydrogenated regions of the Kraft lignin and light oil fraction obtained at 290 °C, 4h and CoMo/SBA-15 catalyst.

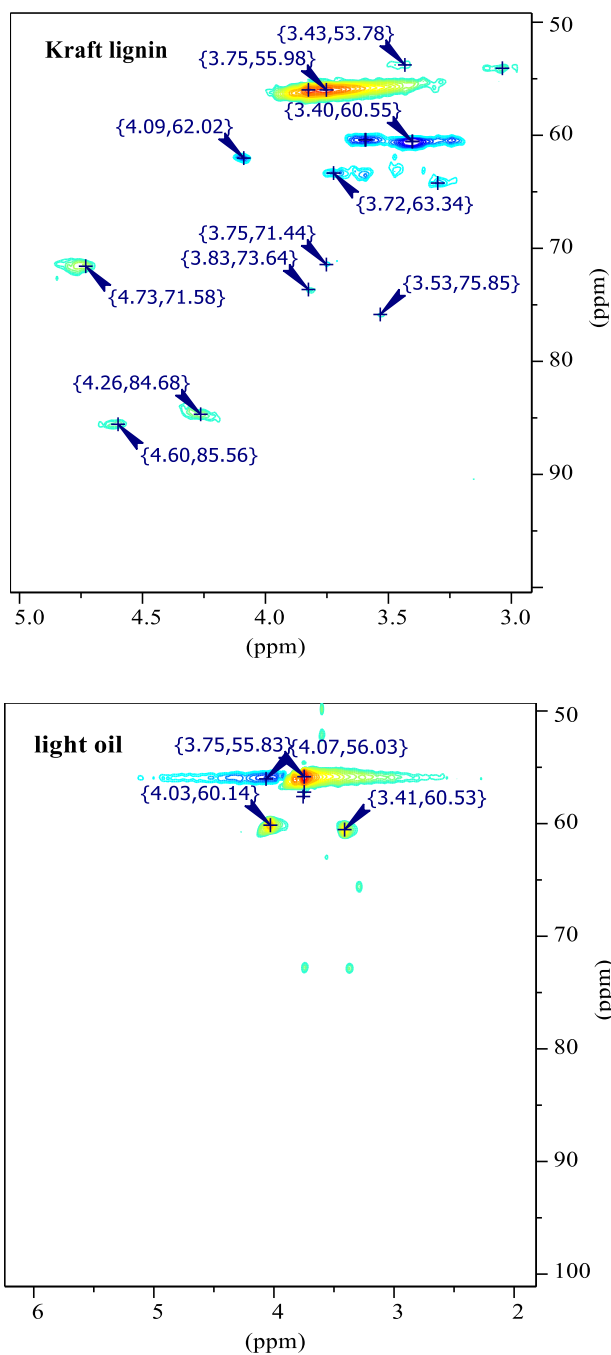

**Fig. S9** Assignments of peaks/peak picking in the oxygenated and side-chain regions of the Kraft lignin and light oil obtained at 290 °C, 4h and CoMo/SBA-15 catalyst.

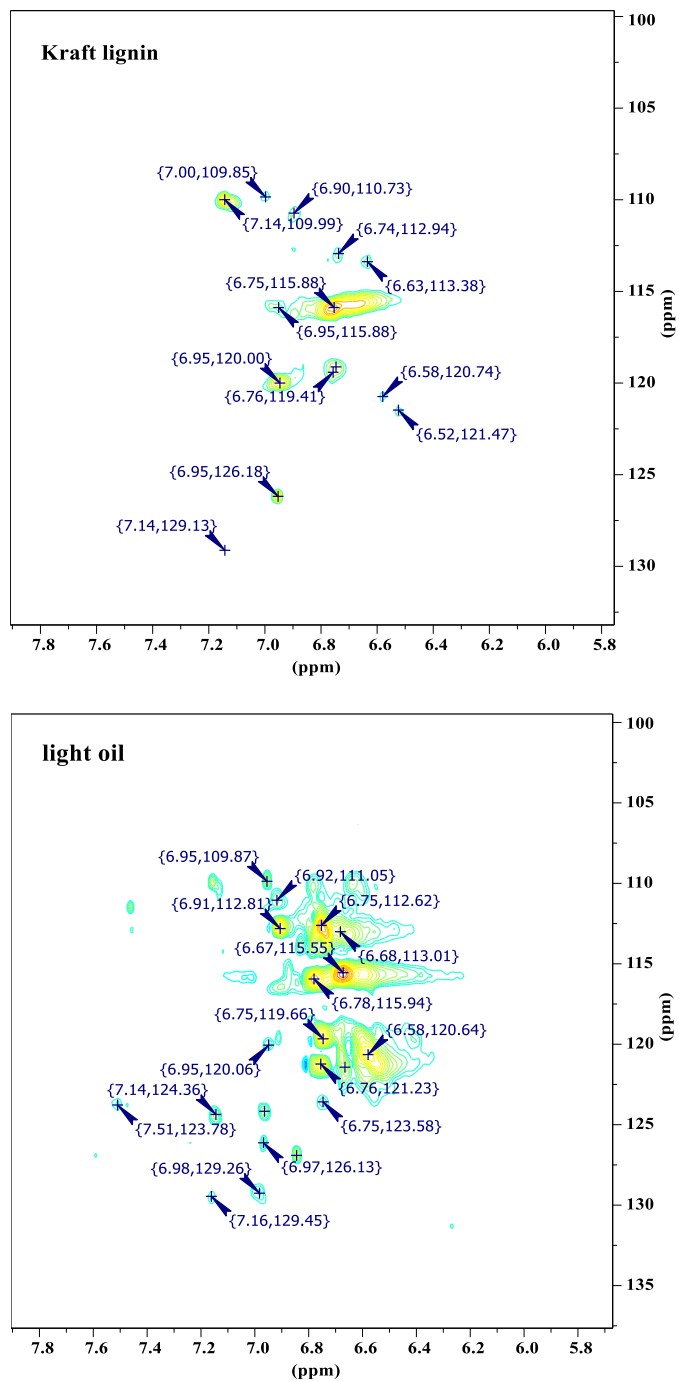

**Fig. S10** Assignments of peaks/peak picking in the aromatic regions of the Kraft lignin and light oil obtained at 290 °C, 4h and CoMo/SBA-15 catalyst.

**Table S1.** The ICP–OES results of the prepared catalyst.

| Catalyst    | Metal content (wt%) |     |
|-------------|---------------------|-----|
|             | Mo                  | Co  |
| SBA-15      | -                   | -   |
| Mo/SBA-15   | 9.8                 | -   |
| Co/SBA-15   | -                   | 9.7 |
| CoMo/SBA-15 | 4.9                 | 4.8 |

**Table S2.** Results of KL depolymerization under different reaction conditions.

| Parameters       | Conditions  | Heavy-oil (wt%) | Light-oil (wt%) | Solid residue (wt%) | Gas (wt%)    |
|------------------|-------------|-----------------|-----------------|---------------------|--------------|
| Time (h)         | 0.5         | 19.82 ± 0.25    | 10.26 ± 0.10    | 63.12 ± 1.03        | 6.33 ± 0.22  |
|                  | 2           | 22.75 ± 0.30    | 21.00 ± 0.27    | 48.50 ± 0.88        | 7.65 ± 0.16  |
|                  | 3           | 18.32 ± 0.19    | 27.00 ± 0.35    | 44.81 ± 0.73        | 10.02 ± 0.60 |
|                  | 4           | 17.88 ± 0.22    | 29.17 ± 0.50    | 41.50 ± 0.59        | 11.80 ± 0.17 |
|                  | 6           | 19.25 ± 0.18    | 25.39 ± 0.44    | 45.06 ± 0.37        | 10.61 ± 0.29 |
| Temperature (°C) | 240         | 17.60 ± 0.75    | 15.00 ± 0.26    | 61.02 ± 1.53        | 6.70 ± 0.32  |
|                  | 260         | 14.75 ± 0.24    | 21.00 ± 0.33    | 56.50 ± 1.15        | 8.11 ± 0.18  |
|                  | 270         | 13.17 ± 0.70    | 25.00 ± 0.28    | 52.81 ± 0.88        | 9.40 ± 0.56  |
|                  | 290         | 17.88 ± 0.13    | 29.17 ± 0.70    | 41.50 ± 0.57        | 11.40 ± 0.66 |
|                  | 320         | 19.70 ± 0.23    | 26.00 ± 0.64    | 44.06 ± 0.68        | 10.01 ± 0.49 |
| Catalyst         | Control     | 17.88 ± 0.51    | 29.17 ± 0.68    | 41.50 ± 0.67        | 11.00 ± 0.28 |
|                  | SBA-15      | 15.60 ± 0.33    | 32.60 ± 0.56    | 38.50 ± 0.79        | 13.00 ± 0.14 |
|                  | Co/SA-15    | 13.70 ± 0.43    | 38.90 ± 0.75    | 33.50 ± 0.38        | 14.20 ± 0.55 |
|                  | Mo/SBA-15   | 12.96 ± 0.11    | 43.50 ± 0.61    | 31.70 ± 0.77        | 14.01 ± 0.39 |
|                  | CoMo/SBA-15 | 8.42 ± 0.17     | 48.20 ± 0.82    | 28.50 ± 0.26        | 14.60 ± 0.24 |

**Table S3.** FT-IR spectra of KL and bio-oils obtained under different reaction conditions.

| Wavenumber (cm <sup>-1</sup> ) | Characteristics                                          |
|--------------------------------|----------------------------------------------------------|
| 3093–3619                      | O–H group.                                               |
| 2928                           | C–H (aliphatic and aromatic).                            |
| 2831                           | C–H (methoxy group).                                     |
| 1712/1733                      | C=O in unconjugated ketones, carbonyl and ester groups). |
| 1602                           | aromatic ring (C=C) vibration.                           |
| 1512                           | aromatic ring (C=C) vibration.                           |
| 1460                           | –OCH <sub>3</sub>                                        |
| 1270, 1150, 1118               | G ring and C–O vibrations.                               |
| 1035                           | C–O vibration in ether, acid or ester groups.            |
| 860-741                        | para–substituted aromatic ring.                          |

**Table S4.** Assignment of  $^{13}\text{C}$ - $^1\text{H}$  cross-signal in the HSQC spectra of Kraft lignin.

| label                                  | $\delta_{\text{C}}/\delta_{\text{H}}$    | assignment                                                                                                |
|----------------------------------------|------------------------------------------|-----------------------------------------------------------------------------------------------------------|
| CH <sub>3</sub>                        | 0-1/10-16                                | CH <sub>3</sub> $\gamma$ to Ar                                                                            |
| CH <sub>3</sub> , CH <sub>2</sub>      | 1-1.4/16-23                              | CH <sub>3</sub> , CH <sub>2</sub> $\beta$ to Ar, CH $\gamma$ to Ar                                        |
| CH <sub>2</sub> , CH                   | 1.4-1.9/23-30                            | CH <sub>2</sub> , CH $\beta$ to Ar                                                                        |
| CH <sub>3</sub> , CH <sub>2</sub> , CH | 1.9-3.5/30-52.5                          | CH <sub>3</sub> , CH <sub>2</sub> , CH $\alpha$ to Ar                                                     |
| C <sub><math>\beta</math></sub>        | 53.78/3.43                               | C <sub><math>\beta</math></sub> -H <sub><math>\beta</math></sub> in phenylcoumaran substructures (C)      |
| B <sub><math>\beta</math></sub>        | 54.07/3.04                               | C <sub><math>\beta</math></sub> -H <sub><math>\beta</math></sub> in resinol substructures (B)             |
| -OCH <sub>3</sub>                      | 55.98/3.75                               | C-H in methoxyl                                                                                           |
| A <sub><math>\gamma</math></sub>       | 60.55/3.40 and<br>60.40/3.59             | C <sub><math>\gamma</math></sub> -H <sub><math>\gamma</math></sub> in $\beta$ -O-4' substructures (A)     |
| D <sub><math>\gamma</math></sub>       | 62.02/4.09                               | C <sub><math>\gamma</math></sub> -H <sub><math>\gamma</math></sub> in coniferyl alcohol substructures (D) |
| C <sub><math>\gamma</math></sub>       | 63.34/3.72 and<br>64.23/3.30             | C <sub><math>\gamma</math></sub> -H <sub><math>\gamma</math></sub> in phenylcoumaran substructures (C)    |
| A <sub><math>\alpha</math></sub>       | 71.58/4.73                               | C <sub><math>\alpha</math></sub> -H <sub><math>\alpha</math></sub> in $\beta$ -O-4' substructures (A)     |
| B <sub><math>\gamma</math></sub>       | 71.44/3.75, 73.64/3.83<br>and 75.85/3.53 | C <sub><math>\gamma</math></sub> -H <sub><math>\gamma</math></sub> in resinol substructures (B)           |
| A <sub><math>\beta</math></sub>        | 84.68/4.26                               | C <sub><math>\beta</math></sub> -H <sub><math>\beta</math></sub> in $\beta$ -O-4' substructures (A)       |
| B <sub><math>\alpha</math></sub>       | 85.56/4.60                               | C <sub><math>\alpha</math></sub> -H <sub><math>\alpha</math></sub> in resinol substructures (B)           |
| G <sub>2'</sub>                        | 109.99/7.14                              | C <sub>2</sub> -H <sub>2</sub> in oxidized guaiacyl units (G')                                            |
| G <sub>2</sub>                         | 113.38-109.99/6.63-6.90                  | C <sub>2</sub> -H <sub>2</sub> in guaiacyl units (G)                                                      |
| G <sub>5</sub>                         | 115.88/6.75                              | C <sub>2</sub> -H <sub>2</sub> in guaiacyl units (G)                                                      |
| G <sub>6</sub>                         | 119.41-121.47/6.52-6.76                  | C <sub>6</sub> -H <sub>6</sub> in guaiacyl units (G)                                                      |
| G <sub>6'</sub>                        | 120.00/6.95                              | C <sub>6</sub> -H <sub>6</sub> in oxidized guaiacyl units (G')                                            |
| G <sub>4</sub>                         | 126.13/6.97                              | C <sub>2</sub> -H <sub>2</sub> in guaiacyl units (G)                                                      |
| H <sub>2,6</sub>                       | 129.13/7.14                              | C <sub>2,6</sub> -H <sub>2,6</sub> in <i>p</i> -hydroxyphenyl units (H)                                   |

**Table S5.** Elemental analyses of Kraft lignin and bio-oil fractions.

| Entry | Sample                               | Elemental compositions (%) |      |       |      |      | HHV (MJ/kg) <sup>d</sup> |
|-------|--------------------------------------|----------------------------|------|-------|------|------|--------------------------|
|       |                                      | C                          | H    | O     | N    | S    |                          |
| 1     | KL                                   | 61.69                      | 6.09 | 30.09 | 0.65 | 1.48 | 25.92                    |
| 2     | Control (heavy oil) <sup>a</sup>     | 65.47                      | 6.86 | 26.23 | 0.39 | 1.05 | 28.44                    |
| 3     | Mo/SBA-15 (heavy oil) <sup>b</sup>   | 67.61                      | 6.92 | 24.81 | 0.32 | 0.34 | 29.24                    |
| 4     | CoMo/SBA-15 (heavy oil) <sup>c</sup> | 67.74                      | 7.29 | 24.44 | 0.41 | 0.12 | 29.75                    |
| 5     | CoMo/SBA-15 (light oil) <sup>c</sup> | 71.23                      | 8.31 | 20.16 | 0.23 | 0.07 | 32.60                    |

<sup>a</sup> Reaction conditions = 3.0g lignin, 90 mL ethanol, 290 °C and 4h.

<sup>b</sup> Reaction conditions = 3.0g lignin, 90 mL ethanol, 290 °C, 4h and 0.3 g Mo/SBA-15 catalyst (10 wt%).

<sup>c</sup> Reaction conditions = 3.0g lignin, 90 mL ethanol, 290 °C, 4h and 0.3g CoMo/SBA-15 catalyst (10 wt%).

<sup>d</sup>  $HHV(MJ/kg) = [(34 \times C) + (124.3 \times H) + (6.3 \times N) + (19.3 \times S) - (9.8 \times O)]/100$
